# Supplementary material for: Predicting compositional changes of organic–inorganic hybrid materials with Augmented CycleGAN
Source: Royal Society of Chemistry journal article supplement (doi:10.1039/d1dd00044f), 2022-01-01
Supplement: d1dd00044f1.pdf [file d1dd00044f1.pdf]

Electronic Supplementary Information (ESI)

## **Predicting compositional changes of organic-inorganic hybrid materials with Augmented CycleGAN**

Qianxiang Ai <sup>a</sup>, Alexander J. Norquist <sup>b</sup>, Joshua Schrier <sup>a</sup>

- a. Department of Chemistry, Fordham University, 441 E. Fordham Rd, The Bronx, New York, 10458 USA
- b. Department of Chemistry, Haverford College, 370 Lancaster Ave, Haverford, PA, 19041 USA

## Supplementary figures

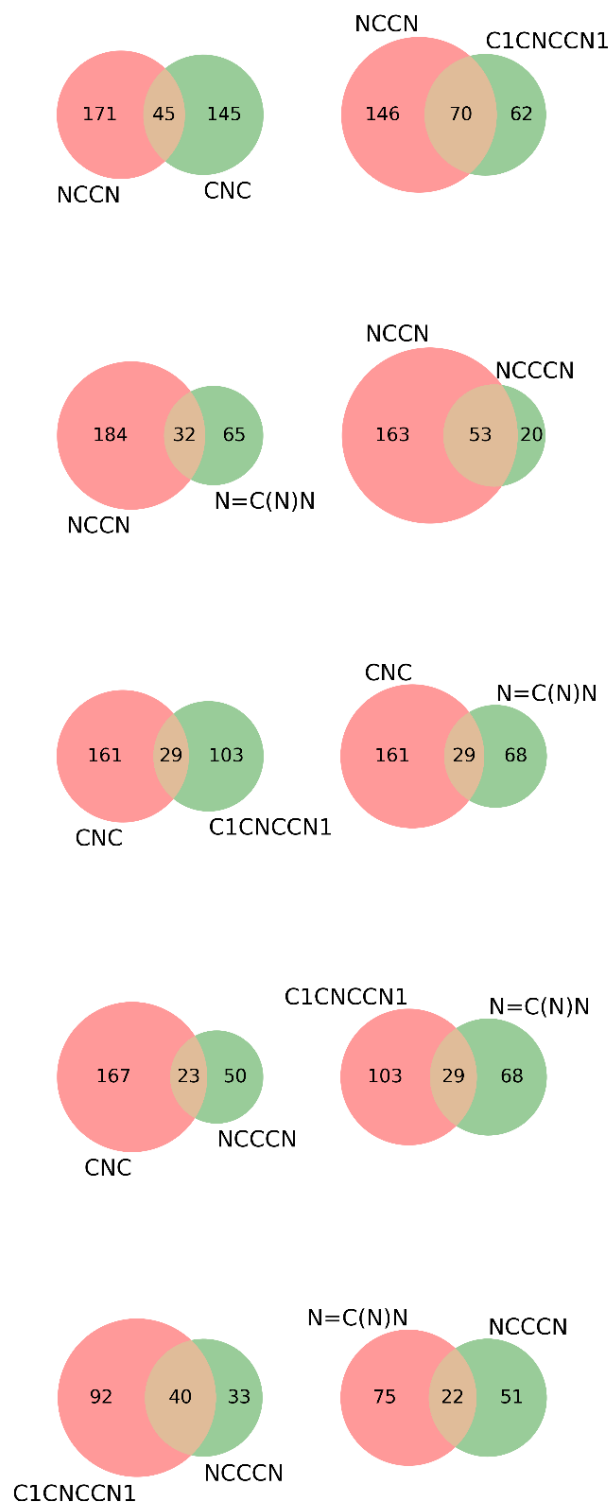

Figure S 1. Venn diagram of chemical systems found in structure groups.

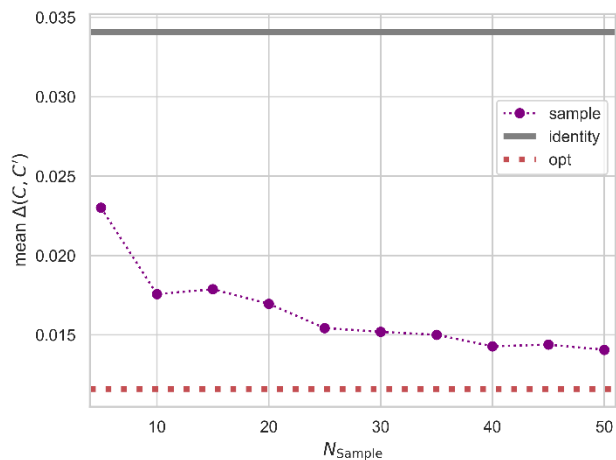

Figure S 2. Mean value of  $\Delta_{\text{sample}}$  as a function of  $N_{\text{sample}}$ .

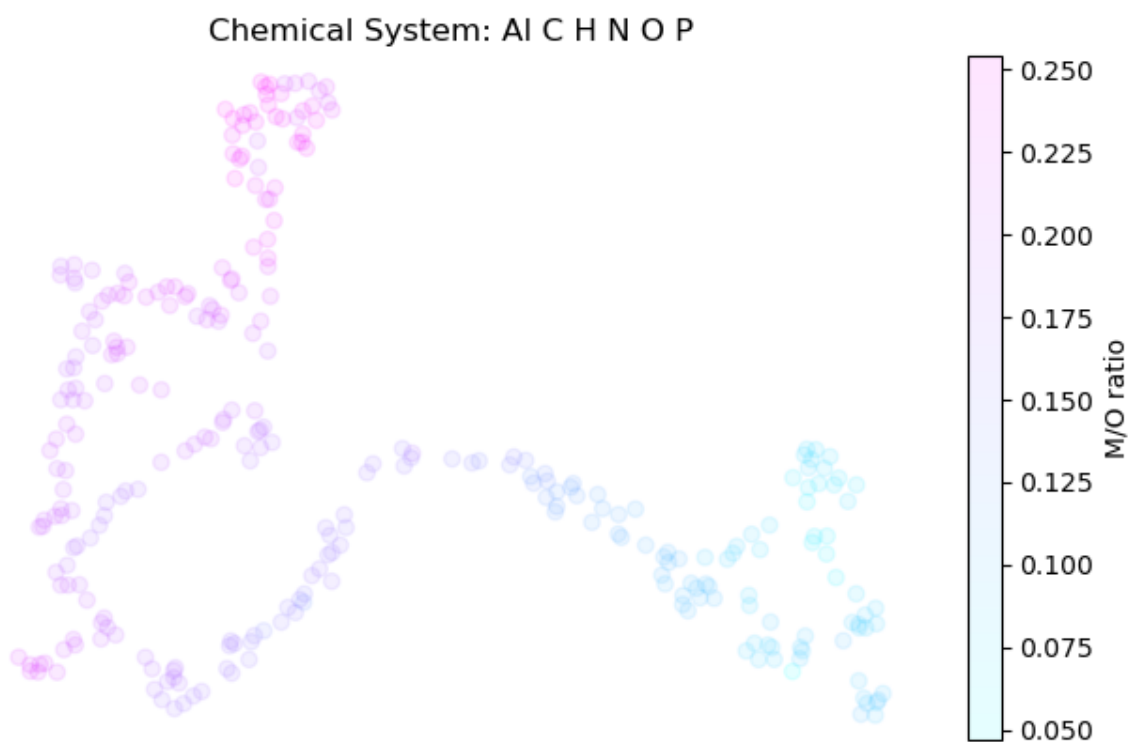

Figure S 3. Generated compositions of Al-C-H-N-O-P system colored by Al/O ratio. See Figure 9 in the main text for more details.

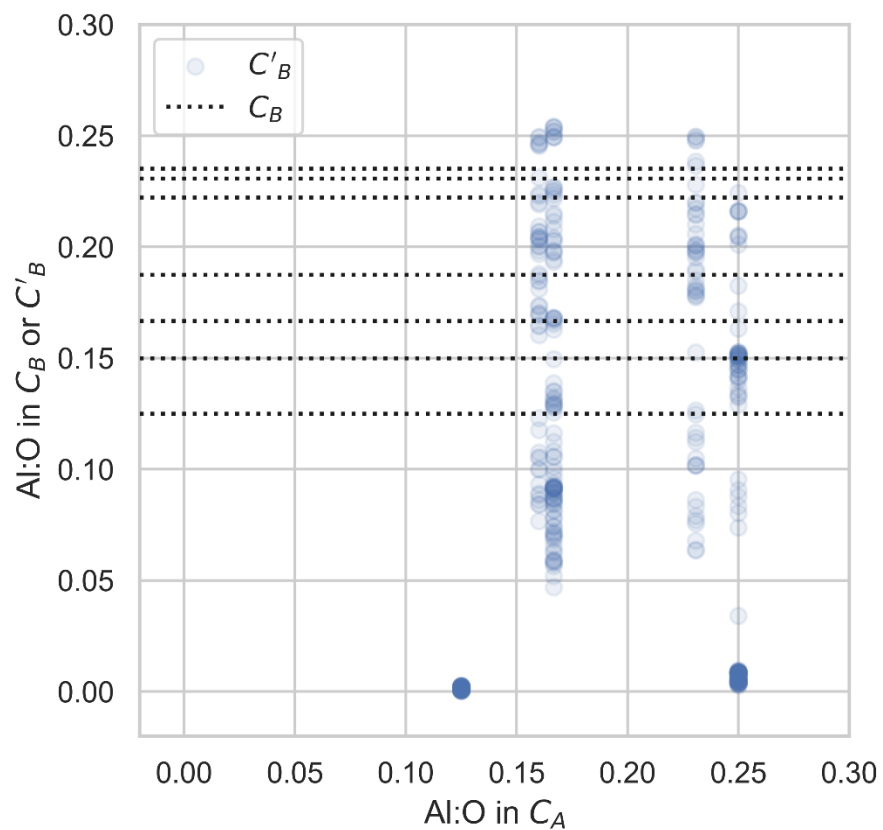

**Figure S 4.** Values of Al:O ratio of generated compositions of Al-C-H-N-O-P system.

## CRediT

<http://credit.niso.org>

QA: Methodology, Software, Data curation, Writing- Original draft, Visualization, Investigation.

JS: Supervision, Conceptualization, Writing - Review & Editing.

AN: Supervision, Conceptualization, Writing - Review & Editing.
